# Supplementary material for: Lack of robustness of hydrological models: a large-sample diagnosis and an attempt to identify hydrological and climatic drivers
Source: Copernicus journal article supplement (doi:10.5194/hess-29-683-2025), 2025-02-04
Supplement: Supplementary file 1 [file hess-29-683-2025-supplement.zip]

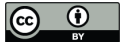

*Supplement of*

**Lack of robustness of hydrological models: a large-sample diagnosis and an attempt to identify hydrological and climatic drivers**

**Léonard Santos et al.**

*Correspondence to:* Vazken Andréassian ([vazken.andreassian@inrae.fr](mailto:vazken.andreassian@inrae.fr))

- [hess-29-683-2025-supplement-title-page.pdf](#)
- [Supplementary\\_Materials](#)
  - [Supplementary-File-S1.pdf](#)
  - [Supplementary-File-S2.pdf](#)
  - [Supplementary-File-S3.pdf](#)
  - [Supplementary-File-S4.pdf](#)
  - [Supplementary-File-S5.pdf](#)

The copyright of individual parts of the supplement might differ from the article licence.
