# Supplementary material for: Lack of robustness of hydrological models: a large-sample diagnosis and an attempt to identify hydrological and climatic drivers
Source: Copernicus journal article supplement (doi:10.5194/hess-29-683-2025), 2025-02-04

## Supplementary material 5: Effect of a change of evapotranspiration formula on the GR6J robustness RAT results over the French catchment set.

Location and number of French catchments on which GR6J react to the RAT using temperature (left), precipitation (centre) and humidity index (right) as predictors and the evapotranspiration formulas of Oudin and Penman-Monteith. Numbers at the top of the maps represent the number of reactive catchments out of 146 for each evapotranspiration formula.

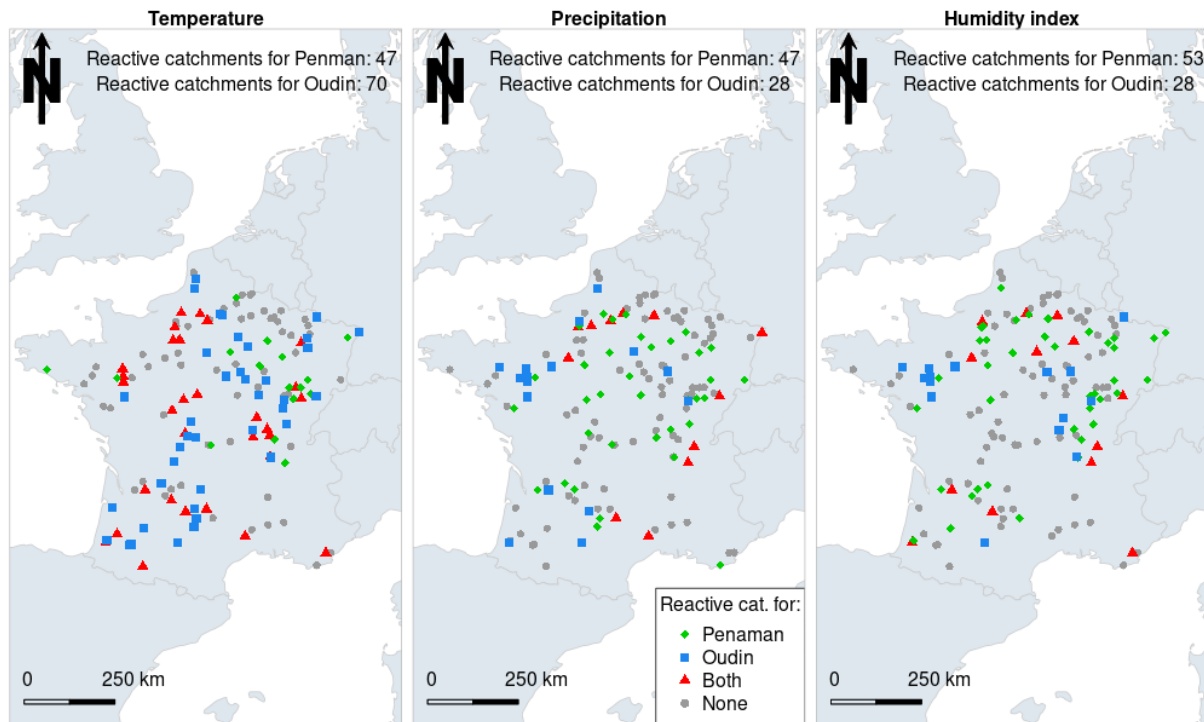

Supplement: Supplementary file 2 [file hess-29-683-2025-supplement.zip]
